# Supplementary material for: Strontium stannate nanoparticles decorated on graphitic carbon nitride sheets for the electrochemical detection of 3-nitro-l-tyrosine
Source: Royal Society of Chemistry journal article supplement (doi:10.1039/d4en00461b), 2024-01-01
Supplement: d4en00461b1.pdf [file d4en00461b1.pdf]

**Strontium stannate nanoparticles decorated on graphitic carbon nitride sheets for electrochemical detection of 3-nitro-L-tyrosine**

Aravind Radha,<sup>a</sup> Sea-Fue Wang,<sup>a,\*</sup>

<sup>a</sup>Department of Materials and Mineral Resources Engineering, National Taipei University of Technology, Taipei 106, Taiwan.

**Corresponding author:**

**\*Dr. S.F. Wang:** [sfwang@ntut.edu.tw](mailto:sfwang@ntut.edu.tw)

## ***Materials***

The electrochemical analyses were conducted using phosphate buffer (PB, 0.1 M) prepared from disodium dibasic and sodium dihydrogen phosphate ( $\text{Na}_2\text{HPO}_4$  and  $\text{NaH}_2\text{PO}_4$ ). Screen-printed carbon electrodes (SPCE) were procured from Zensor, Taiwan. Pvt. Ltd. Millipore water purification system (Milli-Q, specific resistivity  $> 18 \text{ M}\Omega \text{ cm}$ , S.A., Molsheim, France) was used as the source of ultrapure fresh water and was used throughout the experiments. The pH adjustments were achieved using HCl and NaOH solutions.

## ***Instrumentation and Methods***

The phase configuration of prepared materials is analysed using X-ray diffraction analysis (XRD) (Bruker (XRD, 2D Phaser). The microstructure and the elemental composition of the as-prepared materials were studied employing a high resolution (HR) transmission electron microscope (TEM) (JEOL JEM-2100F (HR)) operating at 200 kV and by energy-dispersive X-ray spectroscopy using EDAX AMETEK Inc., DigitalMicrograph® software. The electrochemical characteristics were explored using electrochemical impedance spectroscopy (EIS) Autolab. Furthermore, CHI 1211C electrochemical workstation was to carry out electrochemical measurements like cyclic voltammetry (CV) and differential pulse voltammetry (DPV) in a conventional three-electrode cell. Here, the modified SPCE (surface area =  $0.071 \text{ cm}^2$ ), saturated Ag|AgCl, and Pt wire are active as working, reference, and counter electrodes, respectively.

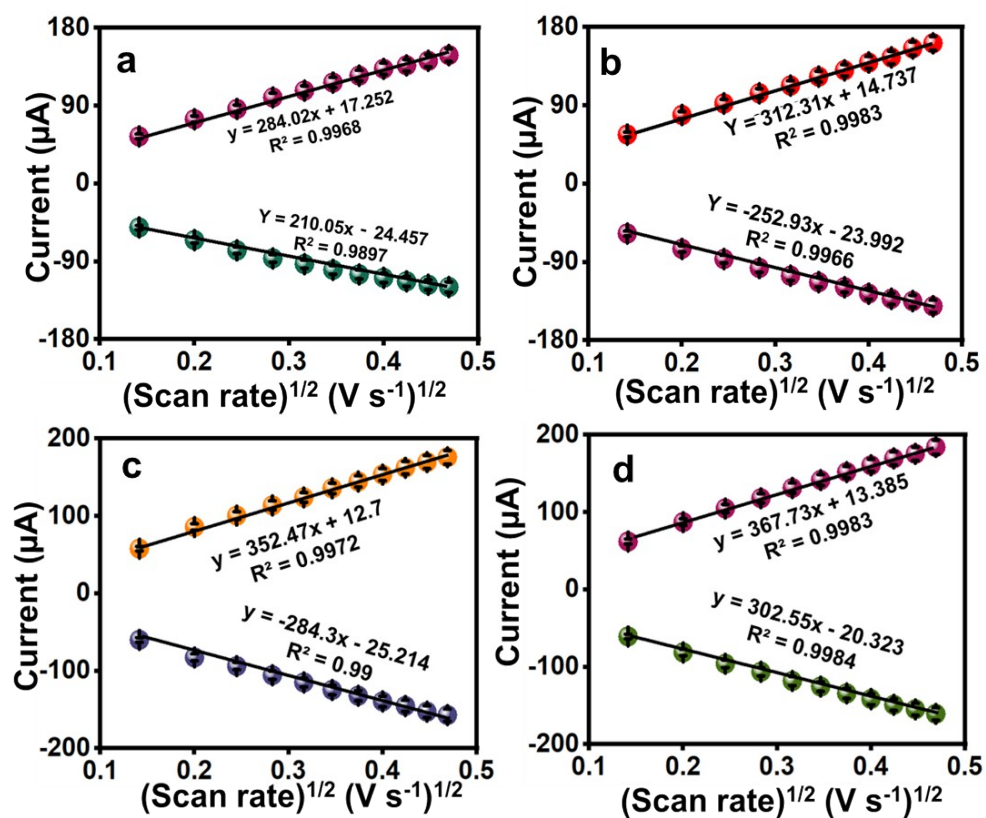

**Figure S1.** Linear plots of (a) bare-, (b)  $\text{SrSnO}_3$ -, (c)  $\text{g-C}_3\text{N}_4$ -, and (d)  $\text{SrSnO}_3@\text{g-C}_3\text{N}_4$  modified in mM  $[\text{Fe}(\text{CN})_6]^{3-/4-}$  and 0.1 M KCl solution.

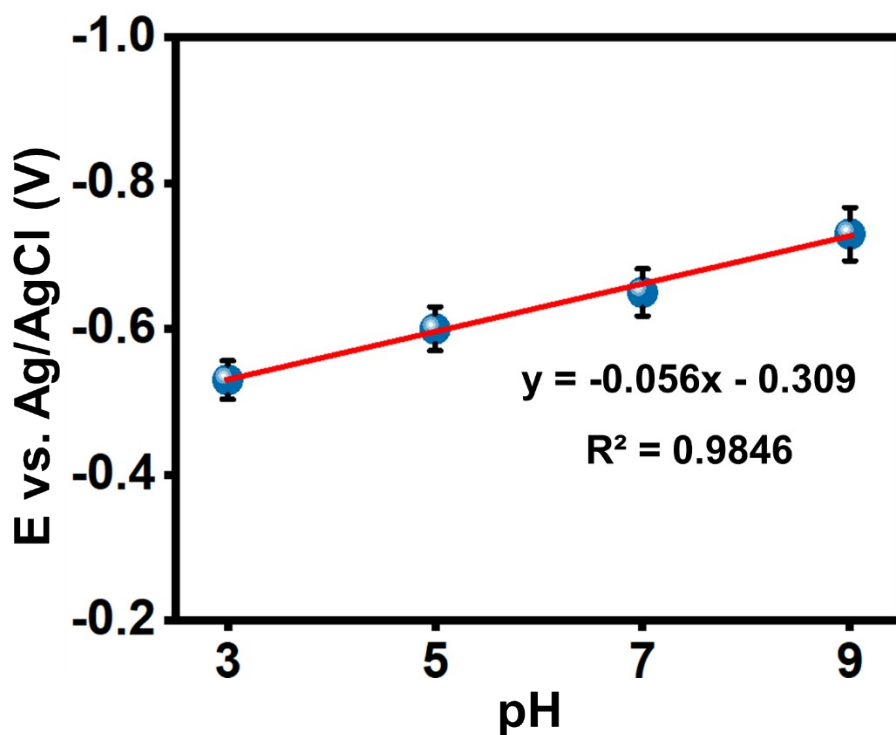

Figure S2. Plots of pH versus peak potential.

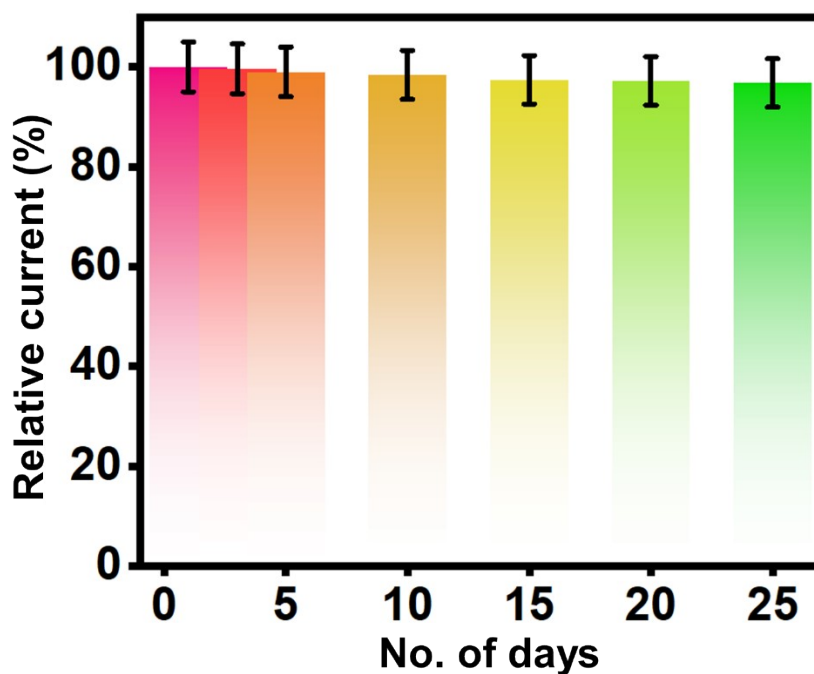

Figure S3. Long-term stability of SrSnO<sub>3</sub>/g-C<sub>3</sub>N<sub>4</sub> in the presence of 3-nitro-L-tyro.

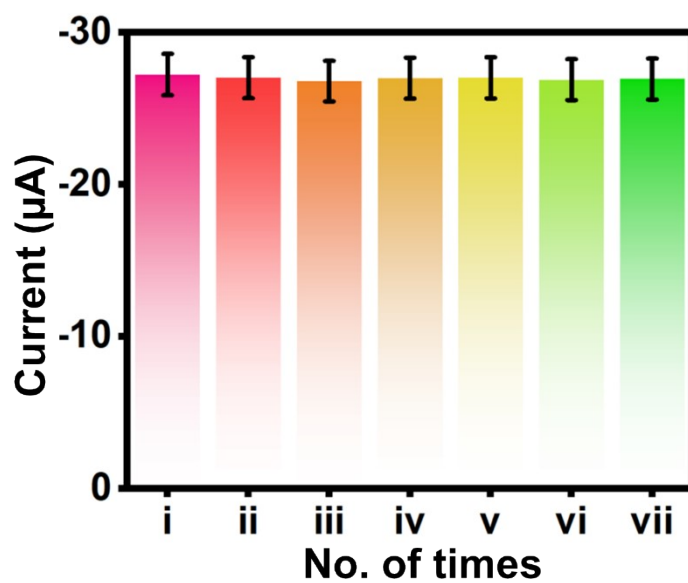

**Figure S4.** Repeatability of SrSnO<sub>3</sub>/g-C<sub>3</sub>N<sub>4</sub> modified electrode in the presence of 3-nitro-L-tyro.

**Table S1.** Recovery percentages of different real-world samples.

| Samples     | Spiked (nM) | Found (nM) | Recovery (%)<br>(n=3) |
|-------------|-------------|------------|-----------------------|
| River water | 0           | 0          | –                     |
|             | 1           | 0.97       | 97.00                 |
|             | 2           | 1.92       | 96.00                 |
|             | 5           | 4.98       | 99.60                 |
|             | 10          | 9.98       | 99.80                 |
| Tap water   | 0           | 0          | –                     |
|             | 1           | 0.99       | 99.00                 |
|             | 2           | 1.95       | 97.50                 |
|             | 5           | 4.95       | 99.00                 |

|              |    |      |       |
|--------------|----|------|-------|
|              | 10 | 9.92 | 99.20 |
| Lake water   | 0  | 0    | –     |
|              | 1  | 0.99 | 99.00 |
|              | 2  | 1.93 | 96.50 |
|              | 5  | 4.93 | 98.6  |
|              | 10 | 9.97 | 99.7  |
| Fish extract | 0  | 0    | –     |
|              | 1  | 0.98 | 98.00 |
|              | 2  | 1.98 | 99.00 |
|              | 5  | 4.95 | 99.00 |
|              | 10 | 9.94 | 99.40 |
